# 1 A yeast-based tool for mammalian DGATs inhibitors screening

2

3 Peter Gajdoš<sup>1</sup>, Rodrigo Ledesma-Amaro<sup>2</sup>, Jean-Marc Nicaud<sup>3</sup> and Tristan Rossignol<sup>3\*</sup>

4

5 <sup>1</sup>Institute of Biotechnology, Faculty of Chemical and Food Technology, Slovak University of Technology,  
6 Radlinskeho 9, 812 37 Bratislava, Slovakia

7 <sup>2</sup>Imperial College Centre for Synthetic Biology and Department of Bioengineering, Imperial College  
8 London, South Kensington Campus, London SW7 2AZ, UK

9 <sup>3</sup>Université Paris-Saclay, INRAE, AgroParisTech, Micalis Institute, 78350, Jouy-en-Josas, France., France

10

11 \* Corresponding author email: [tristan.rossignol@inrae.fr](mailto:tristan.rossignol@inrae.fr)

12

13 Keywords: *Yarrowia lipolytica*, DGAT, inhibitors screening, heterologous expression

14

## 15 Abstract

16

17 Dysregulation of lipid metabolism is associated with obesity, metabolic diseases but there is also  
18 increasing evidences of a relationship between lipid bodies (LBs) excess and some cancer. LBs synthesis  
19 requires diacylglycerol acyltransferases (DGATs) which catalyses the last step of triacylglycerol (TAG)  
20 synthesis, the main storage lipid form in lipid bodies. DGATs and in particular DGAT2, are therefore  
21 considered as potential therapeutic targets for the control of these pathologies. Here, the murine and  
22 the human DGAT2 were overexpressed in the oleaginous yeast *Yarrowia lipolytica* deleted for all  
23 DGATs activities, for evaluating the functionality of the enzymes in this heterologous host and to  
24 evaluate DGAT activity inhibitors. This work provide evidence that mammalian DGATs expressed in *Y.*  
25 *lipolytica* is a useful tool for screening chemical libraries to identify potential inhibitors or activators of  
26 these enzymes of therapeutic interest.

27

## 28 Introduction

29

30 The diacylglycerol acyltransferase (DGAT) enzymes catalyse the final committed step of the  
31 triacylglycerol (TAG) biosynthesis by esterification of a fatty acyl moiety to a diacylglycerol. These  
32 neutral lipids are stored in organelles called lipid bodies (LBs) in mammalian adipocytes tissues but also  
33 in most eukaryotic cells and in some prokaryotes, as energy molecules or membrane synthesis  
34 synthesis reservoir. In eukaryotes, TAGs are mainly synthesized by DGAT1 and DGAT2, belonging to  
35 two different gene families. DGAT1 and DGAT2 have different roles in TAG synthesis in humans. DGAT1  
36 is highly expressed in the small intestine and has a role in fat absorption while DGAT2 is expressed in  
37 liver and adipose tissues and is responsible for endogenous synthesis of TAG (Cases et al. 1998; Cases  
38 et al. 2001). *dgat1* knockout mice are viable with minor impact on TAG levels and are resistant to diet-  
39 induced obesity (Smith et al. 2000). In contrast, *dgat2* knockout mice present severe TAG decrease and  
40 die shortly after birth (Stone et al. 2004). TAGs excess in tissues is a hallmark of obesity. Therefore,  
41 DGATs are considered as potential therapeutic inhibition targets for the control of obesity, but also for  
42 some diseases related to lipid absorption in the intestine. Moreover, recent studies revealed that high  
43 levels of LBs are also associated with breast cancer (Nisticò et al. 2021) as well as with higher tumor  
44 aggressiveness and chemotherapy resistance (Tirinato et al. 2017). Interestingly DGAT2 is  
45 constitutively activated in various cancers including breast cancer (Hernández-Corbacho and Obeid  
46 2019). Accordingly, Nistico et al. observed that the combined effect of a DGAT2 inhibitor pre-treatment  
47 (PF-06424439) and radiation enhanced radiosensitivity of MCF7 breast cancer cells (Nisticò et al. 2021).  
48 In addition, importance of DGAT2-mediated regulation of TAG metabolism in triple negative breast  
49 cancer has been recently highlighted (Almanza et al. 2022). Therefore, DGAT2 appears as a new  
50 potential therapeutic target in the treatment of breast cancer (Hernández-Corbacho and Obeid 2019).  
51 Because of the lethality of *dgat2* knockout mice model, specific inhibitors that tightly controlled  
52 inhibition of DGAT2 are required. Compound libraries targeting obesity as well as cancer should be  
53 evaluated in a system that could mimic human and mouse DGAT2 structure and activity with ease and  
54 high throughput screening capacity.

55 Being able to express these enzymes in a simple heterologous model would provide an efficient and  
56 versatile tool to characterize these enzymes and potential inhibitors. To do so, in this work, the  
57 oleaginous yeast *Yarrowia lipolytica* has been used as a heterologous host. This yeast is particularly  
58 valuable in this context. It has been a model for lipid metabolism for decades and has a high enzyme  
59 production capacity (Nicaud 2012), it can produce large LBs and it is easy to manipulate thanks to the  
60 numerous modern genetic engineering toolBox now available (Larroude et al. 2018). In particular, a  
61 strain deleted for all the genes coding for enzymes with DGAT activities (Q4) is available (Beopoulos et

62 al. 2012). This strain is not able to form LBs anymore. Previous work has shown that DGAT activity in  
63 *Y. lipolytica* can be easily validated, characterized and modulated by overexpression approaches in this  
64 genetic background, allowing restoration of LBs formation and TAGs accumulation (Aymé et al. 2015;  
65 Gajdoš et al. 2016; Gajdoš et al. 2019). Those previous works established the efficiency and versatility  
66 of the heterologous expression of DGAT in this particular host.

67 In order to determine whether the heterologous constructs could potentially be used as tools to  
68 measure the activity of these enzymes and thus useful for screening chemical libraries to identify  
69 regulatory molecules, the murine and the human DGAT2 were overexpressed in the above mentioned  
70 Q4 strain, as well as the oleaginous fungus *Umbelopsis rhamaniana* DGAT2, the first DGAT2 identified  
71 and expressed in heterologous host (Lardizabal et al. 2001), and the *Y. lipolytica* DGATs for comparison.  
72 MmDGAT2 and HsDGAT2 have already been expressed in heterologous systems including insect cells  
73 and yeast, but mainly for *in vitro* activity assays (Cases et al. 2001; Turkish et al. 2005; Yen et al. 2005;  
74 Stone et al. 2006; Kim et al. 2014). DGATs overexpression in the Q4 chassis strains were therefore first  
75 evaluated for the LBs restoration phenotype and TAG accumulation to evaluate the capacity to use  
76 them as *in vivo* screening tools for DGATs inhibitors candidate drugs. These strains were then exposed  
77 to known inhibitory molecules of mammalian DGAT1 and DGAT2. The results showed that the DGATs  
78 are functional in our chassis and that inhibitors conserved their specificities and efficacy. This work  
79 provided proof of principle for using these strains as a screening system for libraries of molecules to  
80 discover new inhibitors or activators of these enzymes of particular therapeutic interest.

81

## 82 Results and discussion

83

### 84 LBs forming phenotype complementation

85

86 The Q4 chassis strain used in this study is unable to form LBs. Therefore, heterologous DGAT  
87 functionality can be easily evaluated by simple observation of LBs restoration directly supporting  
88 enzymatic activity in the heterologous host. The *Y. lipolytica* YIDGAT1 and YIDGAT2 overexpressed in  
89 the Q4 chassis were previously validated (Beopoulos et al. 2012; Gajdoš et al. 2016) and serve as  
90 controls for the Q4 strains overexpressing MmDGAT2, UrDGAT2 and HsDGAT2. All strains show a  
91 complementation phenotype by formation of LBs (Fig. 1). YIDGAT2 overexpression being the highest,  
92 as expected as it is the main DGAT for lipid accumulation in LBs in *Y. lipolytica* (Gajdoš et al. 2016) while  
93 HsDGAT2 being the lowest in the condition tested with small LBs formation.

94

## 95 DGAT2 Inhibitor activity on HsDGAT2 evaluation

96

97 As the HsDGAT2 is functional in *Y. lipolytica*, we therefore evaluated FP-06424439, a specific inhibitor  
98 of DGAT2, for its capacity to inhibit the LBs formation complementation phenotype in yeast. Serial  
99 concentration of FP-06424439 were tested against the strain Y7378 overexpressing the Human DGAT2.  
100 In these experiments, we increase the C/N ratio in the medium to 30 as it increases the TAG  
101 accumulation in *Y. lipolytica* (Gajdoš et al. 2016) and will consequently improve LBs visualization.  
102 Accordingly, LBs appear bigger in the Y7378 strain without treatment (Fig. 2). Small inhibition of LBs  
103 formation can be observed at 12.5 µg/ml and increases at 25 µg/ml, where almost no LBs can be  
104 observed. At 50 µg/ml, no LBs are formed (Fig. 2). The different concentration of PF-06424439 have  
105 no impact on the fitness of the strain as growth is not affected for all the concentrations tested (Fig. 3).

106

## 107 Specificity of DGAT inhibitors on DGATs from different origins

108

109 The previous experiment established a minimal concentration that inhibits LBs formation without  
110 affecting growth for the DGAT2 specific inhibitor PF-06424439. This is also in the range of  
111 concentrations for which LBs are reduced in MCF7 breast cancer without affecting cells viability  
112 (Nisticò et al. 2021). Therefore, we tested this inhibitor at the same concentration on the six DGAT  
113 overexpressing strains selected in this study to evaluate the DGAT specificity. PF-046020110, a DGAT1  
114 specific inhibitor, was also evaluated as a control. PF-046020110 has no effect on the different strains  
115 overexpressing DGAT even YIDGAT1 at the concentration tested (Fig. 4). PF-06424439 inhibit LBs  
116 formation of the strain overexpressing the HsDGAT2 as demonstrated in Fig. 2, and has a similar effect  
117 on MmDGAT2, while no inhibition was observed for the other strains overexpressing *Y. lipolytica*  
118 DGATs or *U. rhamaniana* DGAT2, indicating a specificity for mammalian DGAT2 (Fig. 4). No growth  
119 defects were observed for all strains with any of the compound (supplementary data).

120

## 121 Conclusion

122

123 Here, we provide strong arguments that *Y. lipolytica* can serve as an efficient platform for the  
124 expression and study of heterologous DGATs and for the screening of therapeutic molecules targeting  
125 these enzymes. The mammalian heterologous DGATs cloned here are from cDNA libraries and not  
126 optimized for expression in *Y. lipolytica*. Nevertheless, we show that the variants used are functional

127 and the sequences are sufficiently conserved to retain activity in the heterologous host while keeping  
128 the drug inhibitor specificity. Thus, this strain platform is perfectly suited to screen compounds libraries  
129 as mammalian DGAT2s react as in their natural environment. In addition, the proof of principle  
130 presented here is performed in microtiterplate, which is well adapted to high throughput screening  
131 thanks to the simple phenotype evaluation.

132

## 133 **Material and methods**

134

### 135 **Compounds, media and culture conditions**

136

137 PF-06424439 and DMSO for PF-046020110 were obtained from Sigma-Aldrich. Stock solutions were  
138 prepared by resuspending the powder at 5mg/mL in sterile distilled water for PF-06424439 and in  
139 pure DMSO for PF-046020110. *E. coli* strains were grown in Luria-Bertani broth medium  
140 complemented with 50 µg/mL kanamycin or 100 µg/mL ampicillin when required. For yeast growth  
141 and transformant selection, minimal YNB medium, composed of 0.17% (w/v) yeast nitrogen base  
142 (without amino acids and ammonium sulfate), 0.5% (w/v) NH<sub>4</sub>Cl, 50 mM phosphate buffer (pH 6.8),  
143 and 2% (w/v) glucose was used. Leucine was added at a final concentration of 0.1 g/L when required.  
144 For higher lipid accumulation experiments, similar YNB medium with 0.15% (w/v) NH<sub>4</sub>Cl and 3% (w/v)  
145 glucose was used, which corresponded to a carbon-to-nitrogen ratio of 30 (C/N 30). Solid media were  
146 complemented with 1.6% agar.

147 For 96 wells microtiterplates, yeasts were pre-cultured in YNB overnight at 28°C, washed and diluted  
148 in fresh YNB medium at an optical density at 600 nm of 0.2. 100 µl of this dilution was mixed with 100  
149 µl of inhibitor solution diluted in YNB at the required concentration. Cultures were grown at 28°C under  
150 constant agitation on a Biotek Synergy MX microtiterplate reader (Biotek Instruments) and monitored  
151 by measuring optical density at 600 nm every 20 min for 72 h.

152

### 153 **Plasmid and strains construction**

154

155 *UrDGAT2* (GenBank accession number: AAK84179.1) was synthesized and codon optimized by  
156 Genscript. The gene was cloned under the pTEF promoter between BamHI and AvrII cloning sites in  
157 the overexpression JMP62 vector (Nicaud et al. 2002) containing the selective marker *URA3*, to  
158 generate JMP2881 plasmid. *MmDGAT2* were PCR-amplified from cDNA cloned vectors (Yen et al. 2005)

159 using primers that allowed Gateway cloning by introducing attb sequences (Attb1-DGAT2\_forward  
160 GGGGACAAGTTTGTACAAAAAAGCAGGCTATGAAGACCCTCATCGCCGCTACTCCGGG; Attb2-  
161 DGAT2\_reverse GGGGACCACTTTGTACAAGAAAGCTGGGTCTCAGTTCACCTCCAGCACCTCAGTCTCTG).  
162 PCR fragments were cloned into the Gateway® vector pDONR207 (Invitrogen) using Gateway BP  
163 clonase (Thermo Fisher Scientific) to generate plasmid JMP1783 and transferred into the *Y. lipolytica*  
164 Gateway expression vector JMP1529 (Leplat et al. 2015) using Gateway LR clonase (Thermo Fisher  
165 Scientific) giving rise to the plasmids JMP1785 (*pTEF-MmDGAT2-URA3ex*). The *HsDGAT2* cDNA clone  
166 (NM\_032564) was bought from Genscript and was amplified with the same primers as for *MmDGAT2*  
167 (one nucleotide difference and no change in the amino acid sequences) to remove the C-terminal tag  
168 present in the vector and introducing the attb sequences for Gateway® cloning. PCR fragments was  
169 cloned into the Gateway® vector pDONR207 (Invitrogen) to generate plasmid JME4451 and transferred  
170 into the *Y. lipolytica* Gateway expression vector JMP1529 (Leplat et al. 2015), giving rise to the plasmids  
171 JMP4468 (*pTEF-HsDGAT2-URA3ex*). The nucleoSpin plasmid easypure Kit (Macherey-Nagel) was used  
172 for plasmid purification and expression cassettes were sequence verified. Expression cassettes from  
173 the *NotI*-digested plasmids JMP2881, JMP1785 and JMP4468 were used for *Y. lipolytica* transformation  
174 in the Y1877 strain (the Q4 strain) which lacked the four acyltransferases (Beopoulos et al. 2012) using  
175 the lithium acetate method (Le Dall et al. 1994), creating strains Y4952 (Q4-UrDGAT2), Y3137 (Q4-  
176 MmDGAT2) and Y7378 (Q4-HsDGAT2) respectively. Strains Y1880 (Q4), strains Y1884 (Q4-YIDGAT1)  
177 and Y1892 (Q4-YIDGAT2) were described previously (Beopoulos et al. 2012). All the plasmids and  
178 strains used in this study are listed in table 1 and 2, respectively.

179

## 180 Fluorescence microscopy

181

182 For LBs staining, cells were stained at room temperature by a 10-min incubation with BODIPY 493/503  
183 (Invitrogen) at 1 µg/mL. Images were taken using a Zeiss Axio Imager M2 microscope with a 100X oil  
184 immersion objective, equipped with an HXP 120 C lamp.

185

## 186 Acknowledgments

187

188 We would like to thank Joel Haas for kindly providing us the *MmDGAT2* vectors.

189

## 190 References

191

- 192 Almanza, A., Mnich, K., Blomme, A., Robinson, C.M., Rodriguez-Blanco, G., Kierszniowska, S.,  
193 McGrath, E.P., Le Gallo, M., Pilalis, E., Swinnen, J.V., Chatziioannou, A., Chevet, E., Gorman, A.M. and  
194 Samali, A. (2022) Regulated IRE1 $\alpha$ -dependent decay (RIDD)-mediated reprogramming of lipid  
195 metabolism in cancer. *Nature communications* **13**, 2493-2493.
- 196 Aymé, L., Jolivet, P., Nicaud, J.-M. and Chardot, T. (2015) Molecular Characterization of the *Elaeis*  
197 *guineensis* Medium-Chain Fatty Acid Diacylglycerol Acyltransferase DGAT1-1 by Heterologous  
198 Expression in *Yarrowia lipolytica*. *PLoS ONE* **10**, e0143113.
- 199 Beopoulos, A., Haddouche, R., Kabran, P., Dulermo, T., Chardot, T. and Nicaud, J.-M. (2012)  
200 Identification and characterization of DGA2, an acyltransferase of the DGAT1 acyl-CoA:diacylglycerol  
201 acyltransferase family in the oleaginous yeast *Yarrowia lipolytica*. New insights into the storage lipid  
202 metabolism of oleaginous yeasts. *Appl Microbiol Biotechnol* **93**, 1523-1537.
- 203 Cases, S., Smith Steven, J., Zheng, Y.-W., Myers Heather, M., Lear Steven, R., Sande, E., Novak, S.,  
204 Collins, C., Welch Carrie, B., Lusic Aldons, J., Erickson Sandra, K. and Farese Robert, V. (1998)  
205 Identification of a gene encoding an acyl CoA:diacylglycerol acyltransferase, a key enzyme in  
206 triacylglycerol synthesis. *Proceedings of the National Academy of Sciences* **95**, 13018-13023.
- 207 Cases, S., Stone, S.J., Zhou, P., Yen, E., Tow, B., Lardizabal, K.D., Voelker, T. and Farese, R.V. (2001)  
208 Cloning of DGAT2, a Second Mammalian Diacylglycerol Acyltransferase, and Related Family  
209 Members. *J Biol Chem* **276**, 38870-38876.
- 210 Gajdoš, P., Hambalko, J., Nicaud, J.-M. and Čertík, M. (2019) Overexpression of diacylglycerol  
211 acetyltransferase from *Euonymus europaeus* in *Yarrowia lipolytica* leads to the production of single-  
212 cell oil enriched with 3-acetyl-1,2-diacylglycerols. *Yeast* **37**, 141-147.
- 213 Gajdoš, P., Ledesma-Amaro, R., Nicaud, J.-M., Čertík, M. and Rossignol, T. (2016) Overexpression of  
214 diacylglycerol acyltransferase in *Yarrowia lipolytica* affects lipid body size, number and distribution.  
215 *FEMS Yeast Res* **16**.
- 216 Hernández-Corbacho, M.J. and Obeid, L.M. (2019) A novel role for DGATs in cancer. *Advances in*  
217 *Biological Regulation* **72**, 89-101.
- 218 Kim, M.O., Lee, S., Choi, K., Lee, S., Kim, H., Kang, H., Choi, M., Kwon, E.B., Kang, M.J., Kim, S., Lee, H.-  
219 J., Lee, H.S., Kwak, Y.-S. and Cho, S. (2014) Discovery of a Novel Class of Diacylglycerol Acyltransferase  
220 2 Inhibitors with a 1*H*-Pyrrolo[2,3-*b*]pyridine Core. *Biol Pharm Bull* **37**, 1655-1660.
- 221 Lardizabal, K.D., Mai, J.T., Wagner, N.W., Wyrick, A., Voelker, T. and Hawkins, D.J. (2001) DGAT2 Is a  
222 New Diacylglycerol Acyltransferase Gene Family: PURIFICATION, CLONING, AND EXPRESSION IN  
223 INSECT CELLS OF TWO POLYPEPTIDES FROM MORTIERELLA RAMANNIANA WITH DIACYLGLYCEROL  
224 ACYLTRANSFERASE ACTIVITY. *J Biol Chem* **276**, 38862-38869.
- 225 Larroude, M., Rossignol, T., Nicaud, J.M. and Ledesma-Amaro, R. (2018) Synthetic biology tools for  
226 engineering *Yarrowia lipolytica*. *Biotechnol Adv* **36**, 2150-2164.
- 227 Le Dall, M.T., Nicaud, J.M. and Gaillardin, C. (1994) Multiple-copy integration in the yeast *Yarrowia*  
228 *lipolytica*. *Curr Genet* **26**, 38-44.
- 229 Leplat, C., Nicaud, J.-M. and Rossignol, T. (2015) High-throughput transformation method for  
230 *Yarrowia lipolytica* mutant library screening. *FEMS Yeast Res* **15**.
- 231 Nicaud, J.-M., Madzak, C., van den Broek, P., Gysler, C., Duboc, P., Niederberger, P. and Gaillardin, C.  
232 (2002) Protein expression and secretion in the yeast *Yarrowia lipolytica*. *FEMS Yeast Res* **2**, 371-379.
- 233 Nicaud, J.M. (2012) *Yarrowia lipolytica*. *Yeast* **29**, 409-418.
- 234 Nisticò, C., Pagliari, F., Chiarella, E., Fernandes Guerreiro, J., Marafioti, M.G., Aversa, I., Genard, G.,  
235 Hanley, R., Garcia-Calderón, D., Bond, H.M., Mesuraca, M., Tirinato, L., Spadea, M.F. and Seco, J.C.  
236 (2021) Lipid Droplet Biosynthesis Impairment through DGAT2 Inhibition Sensitizes MCF7 Breast  
237 Cancer Cells to Radiation. *Int J Mol Sci* **22**, 10102.

238 Smith, S.J., Cases, S., Jensen, D.R., Chen, H.C., Sande, E., Tow, B., Sanan, D.A., Raber, J., Eckel, R.H.  
239 and Farese, R.V. (2000) Obesity resistance and multiple mechanisms of triglyceride synthesis in mice  
240 lacking Dgat. *Nat Genet* **25**, 87-90.

241 Stone, S.J., Levin, M.C. and Farese, R.V. (2006) Membrane Topology and Identification of Key  
242 Functional Amino Acid Residues of Murine Acyl-CoA:Diacylglycerol Acyltransferase-2. *J Biol Chem*  
243 **281**, 40273-40282.

244 Stone, S.J., Myers, H.M., Watkins, S.M., Brown, B.E., Feingold, K.R., Elias, P.M. and Farese, R.V. (2004)  
245 Lipopenia and Skin Barrier Abnormalities in DGAT2-deficient Mice. *J Biol Chem* **279**, 11767-11776.

246 Tirinato, L., Pagliari, F., Limongi, T., Marini, M., Falqui, A., Seco, J., Candeloro, P., Liberale, C. and Di  
247 Fabrizio, E. (2017) An Overview of Lipid Droplets in Cancer and Cancer Stem Cells. *Stem Cells*  
248 *International* **2017**, 1656053.

249 Turkish, A.R., Henneberry, A.L., Cromley, D., Padamsee, M., Oelkers, P., Bazzi, H., Christiano, A.M.,  
250 Billheimer, J.T. and Sturley, S.L. (2005) Identification of Two Novel Human Acyl-CoA Wax Alcohol  
251 Acyltransferases: MEMBERS OF THE DIACYLGLYCEROL ACYLTRANSFERASE 2 (DGAT2) GENE  
252 SUPERFAMILY\*. *J Biol Chem* **280**, 14755-14764.

253 Yen, C.-L.E., Monetti, M., Burri, B.J. and Farese, R.V. (2005) The triacylglycerol synthesis enzyme  
254 DGAT1 also catalyzes the synthesis of diacylglycerols, waxes, and retinyl esters. *J Lipid Res* **46**, 1502-  
255 1511.

256

257



258

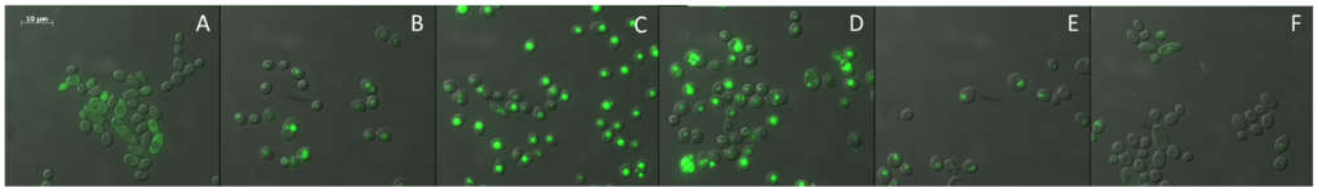

259

260 Fig. 1. Phenotype complementation of strains overexpressing DGAT. A) Strain Y1880 Q4. B) Strain  
261 Y1884 Q4+YIDGAT1. C) Strain Y1892 Q4+YIDGAT2. D) Strain Y3137 Q4+MmDGAT2. E) Strain Y4592  
262 Q4+UrDGAT2. F) Strain Y7378 Q4+HsDGAT2.

263

264

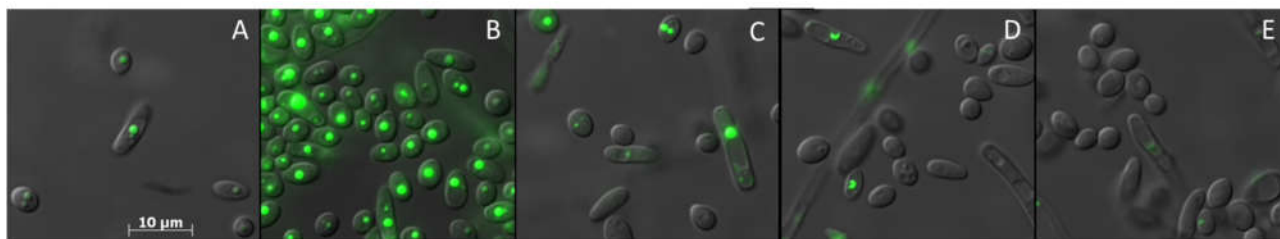

266 Fig. 2. LBs formation inhibition evaluation in Y7378 Q4+HsDGAT2 using different concentration of PF-  
267 06424439. A) 0 µg/mL., B) 6.25 µg/mL., C) 12.5 µg/mL., D) 25 µg/mL., E) 50 µg/mL.

268

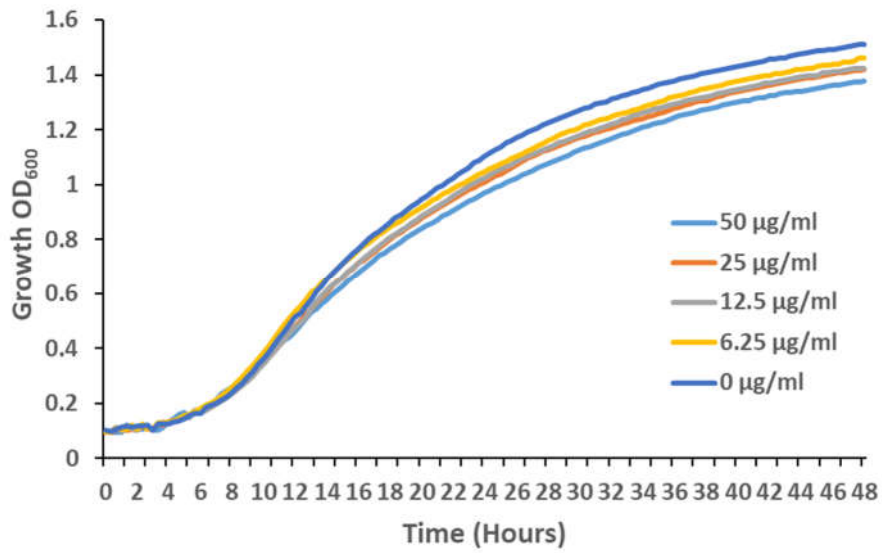

269

270 Fig. 3. Y7378 (Q4+HsDGAT2) growth curve on microtiterplate with increasing concentration of PF-  
271 06424439.

272

273

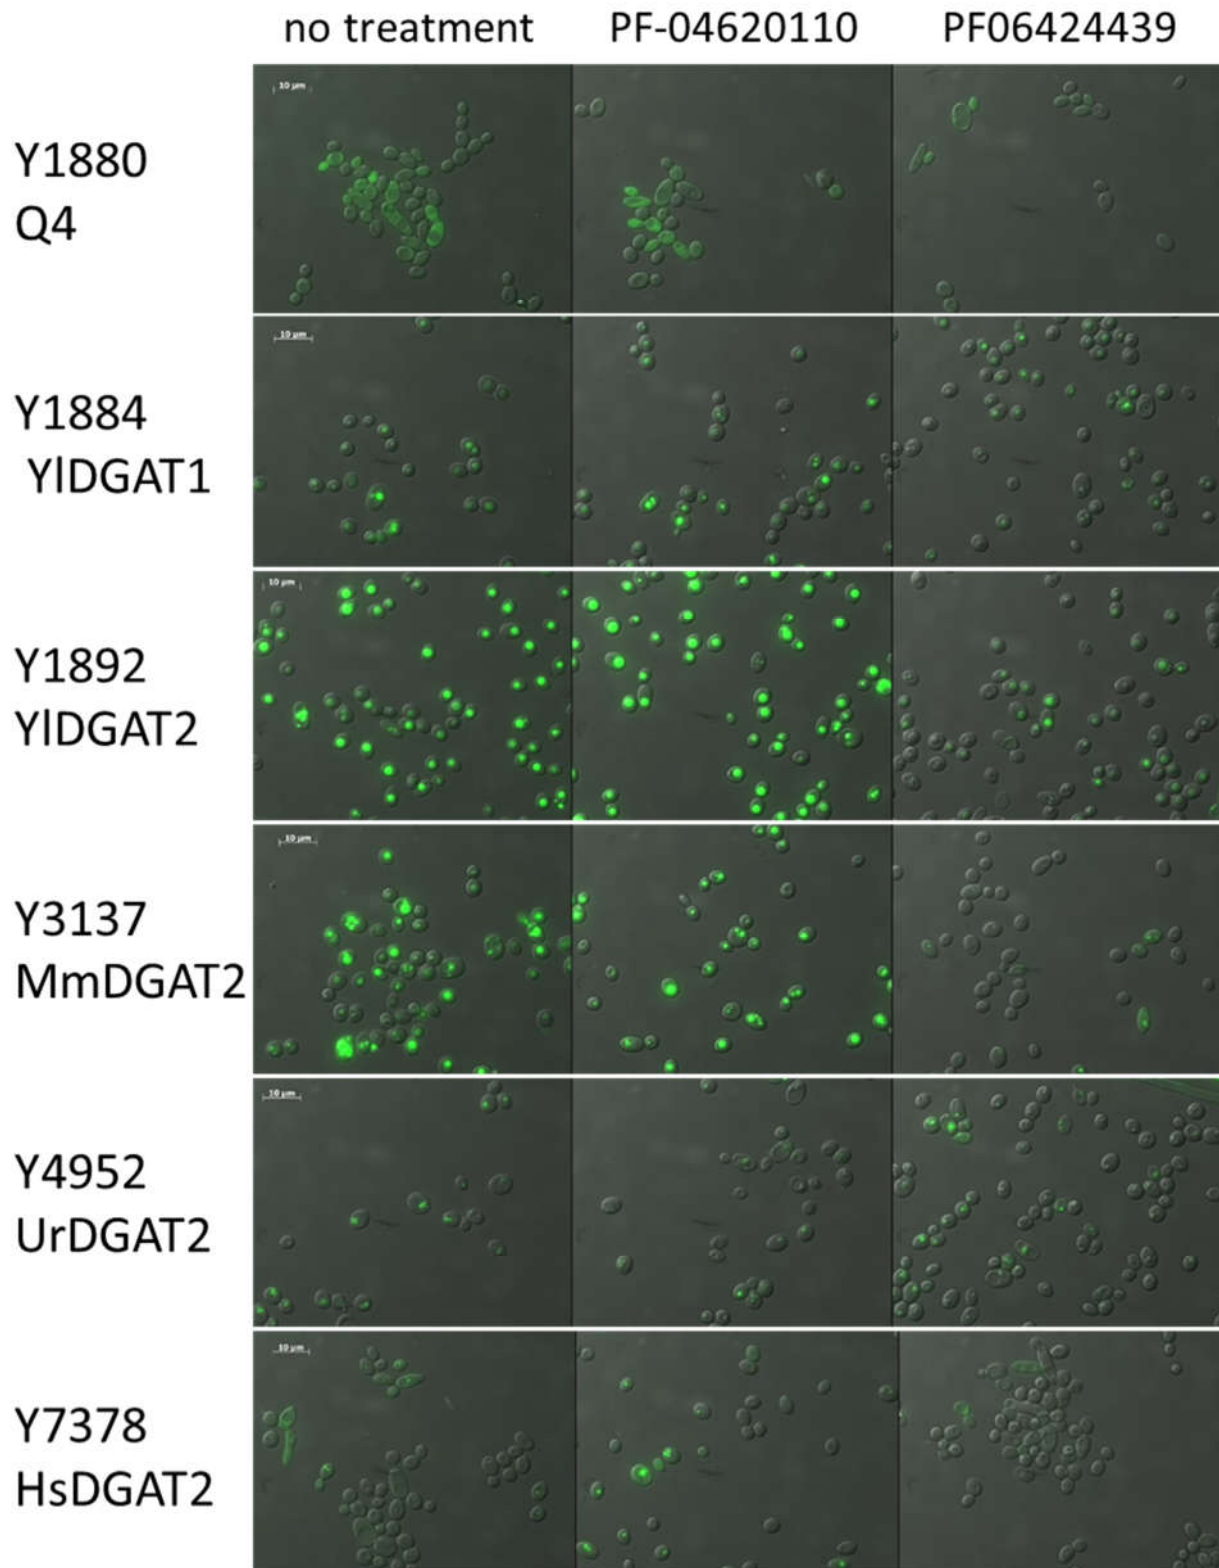

274

275 Fig. 4. LBs formation inhibition evaluation in the strains overexpressing different DGATs using PF-  
276 06424439 and PF-046020110 as inhibitors at 25µg/mL.

277

278 Table 1. List of plasmids used in this study

| Plasmids | genotype                  | References           |
|----------|---------------------------|----------------------|
| JMP1529  | Gateway expression vector | (Leplat et al. 2015) |
| JMP1046  | Expression vector         | (Nicaud et al. 2002) |
| JMP2881  | JME1046+UrDGAT2           | This work            |
| JMP1783  | pDONR207+MmDGAT2          | This work            |
| JMP1785  | JMP1529+MmDGAT2           | This work            |
| JMP4451  | pDONR207-HsDGAT2          | This work            |
| JMP4468  | JME1529-HsDGAT2           | This work            |

279

280

281 Table 2. List of *Y. lipolytica* strains used in this study

| Strains    | Genotype                                                          | References              |
|------------|-------------------------------------------------------------------|-------------------------|
| Y1877 (Q4) | <i>leu2-270 ura3-302 Δdga1Δlro1Δare1Δdga2</i>                     | (Beopoulos et al. 2012) |
| Y1880      | <i>leu2-270 ura3-302 Δdga1Δlro1Δare1 ::URA3 Δdga2</i>             | (Beopoulos et al. 2012) |
| Y1884      | <i>leu2-270 ura3-302 Δdga1Δlro1Δare1Δdga2 pTEF-YIDGAT1-URA3ex</i> | (Beopoulos et al. 2012) |
| Y1892      | <i>leu2-270 ura3-302 Δdga1Δlro1Δare1Δdga2 pTEF-YIDGAT2-URA3ex</i> | (Beopoulos et al. 2012) |
| Y3137      | <i>leu2-270 ura3-302 Δdga1Δlro1Δare1Δdga2 pTEF-MmDGAT2-URA3ex</i> | This work               |
| Y4952      | <i>leu2-270 ura3-302 Δdga1Δlro1Δare1Δdga2 pTEF-UrDGAT2-URA3ex</i> | This work               |
| Y7378      | <i>leu2-270 ura3-302 Δdga1Δlro1Δare1Δdga2 pTEF-HsDGAT2-URA3ex</i> | This work               |

282

283
